# Supplementary material for: Engineered symbiotic bacteria interfering Nosema redox system inhibit microsporidia parasitism in honeybees
Source: PubMed Central journal article supplement (PMC10199888; doi:10.1038/s41467-023-38498-2), 2023-05-20
Supplement: 41467_2023_38498_MOESM1_ESM.pdf [file 41467_2023_38498_MOESM1_ESM.pdf]

## Supplementary Information

Engineered symbiotic bacteria interfering *Nosema* redox system inhibit microsporidia parasitism in honeybees

Lang H et al.

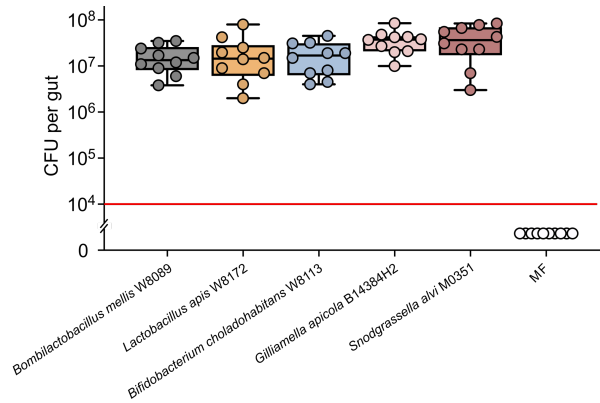

**Supplementary Fig. 1.** The graph showing the total CFU per gut estimated by bacteria culture for MF honeybees and honeybees mono-colonized with *B. choladohabitans* W8113, *B. mellis* W8089, *L. apis* W8172, and *G. apicola* B14384H2. Box plots indicate the median (middle line), 25th, 75th percentile (box), and 5th and 95th percentile (whiskers). n=10 biologically independent replicates.

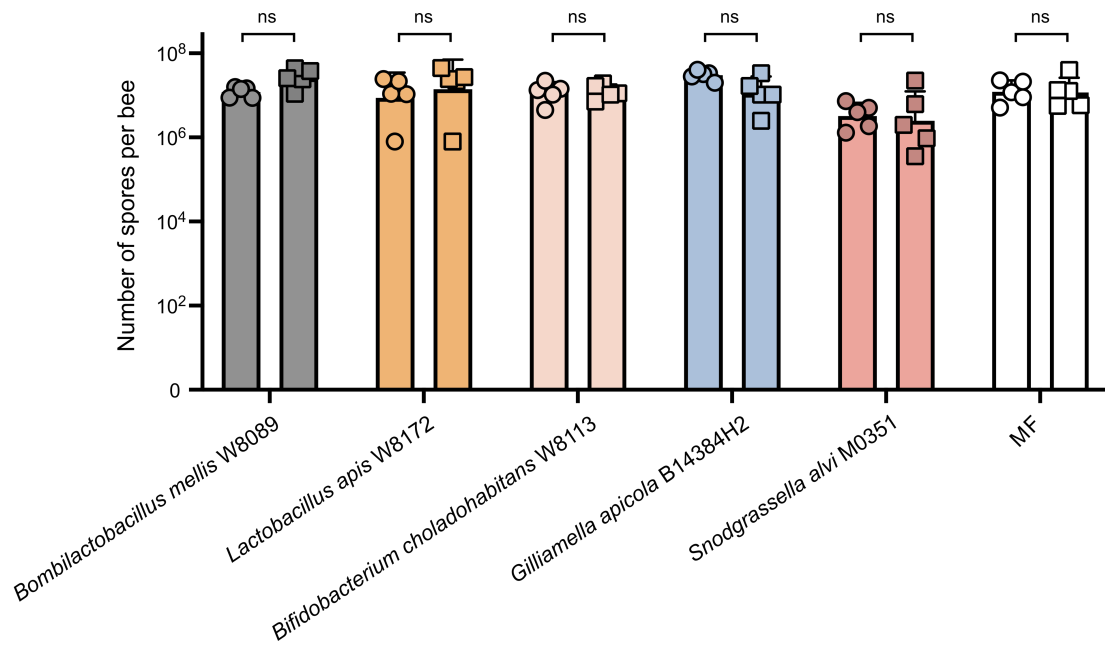

**Supplementary Fig. 2.** Absolute abundance of *N. ceranae* spores in the midgut 10 days post-infection for each colonization group. The shapes in the bar chart correspond to two independent source cup cages. Statistical analysis was performed by the two-sided Mann-Whitney U test,  $n = 5$  bees for all groups. ns, not significant. Error bars represent mean SD.

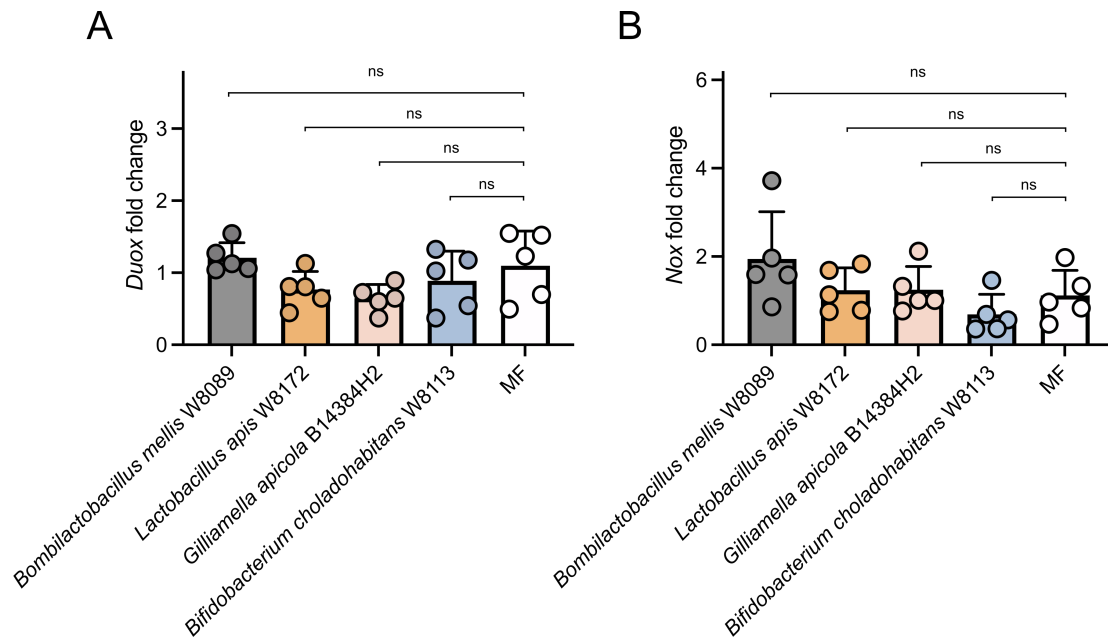

**Supplementary Fig. 3.** The expression level of the *Duox* (A) and *Nox* (B) genes in the midgut following *B. choladohabitans* W8113, *B. mellis* W8089, *L. apis* W8172 and *G. apicola* B14384H2 colonization. No statistical significance between each colonization group and the MF group tested by the two-sided Mann-Whitney U test ( $n = 5$  bees for all groups). ns, not significant. Error bars represent mean SD.

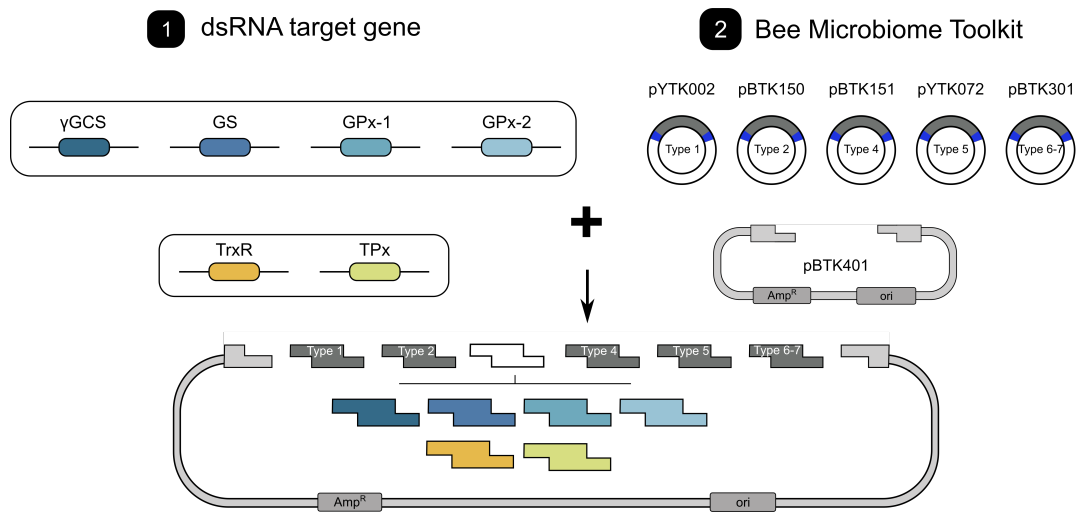

**Supplementary Fig. 4.** Schematic illustration of the Golden Gate assembly strategy for constructing plasmids expressing targeted dsRNA.

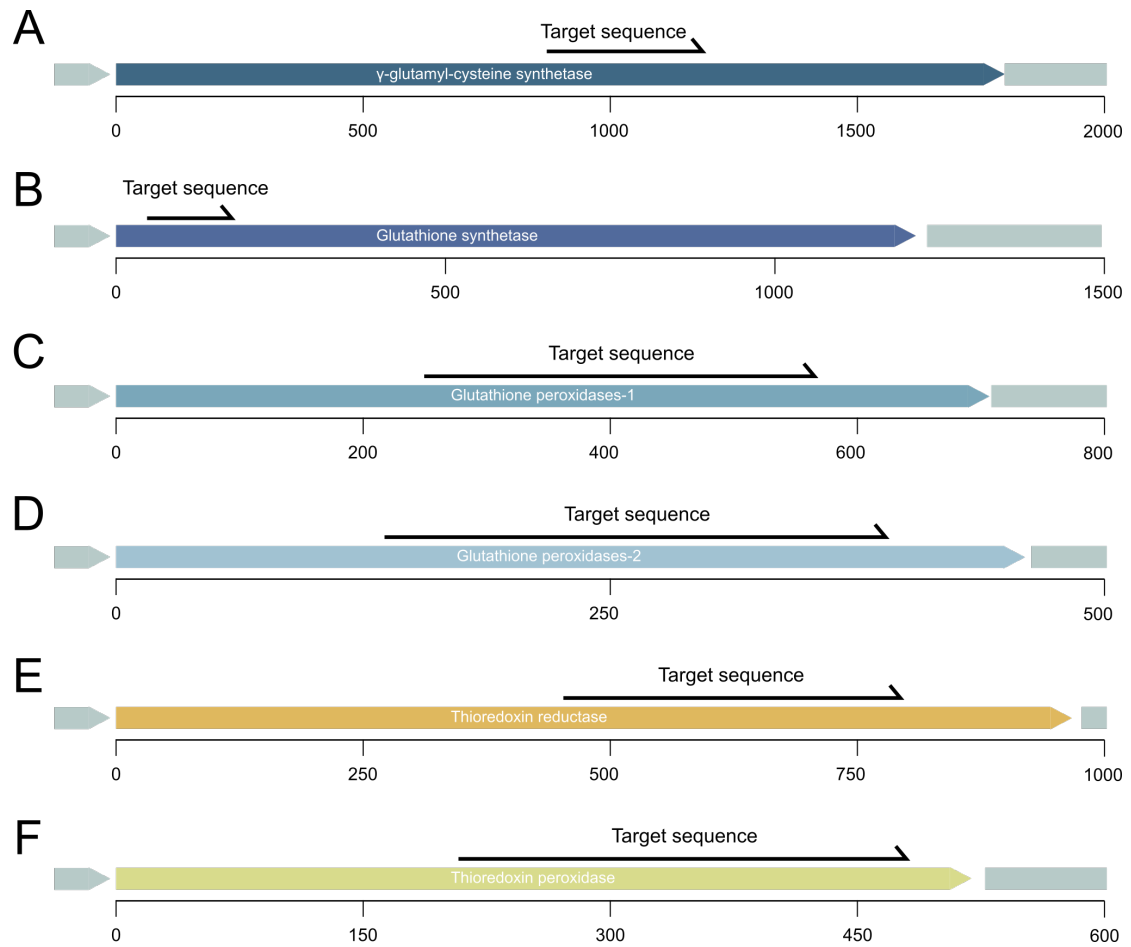

**Supplementary Fig. 5.** Design of *N. ceranae* targets. This diagram shows the overall gene organization for *N. ceranae*  $\gamma$ -glutamyl-cysteine synthetase (A), glutathione synthetase (B), Glutathione peroxidases-1 (C), Glutathione peroxidases-2 (D), thioredoxin reductase (E), and thioredoxin peroxidase (F). The targeted region in each gene is denoted, and the designed target sequences are listed in Supplementary Table 4.

**Supplementary Table 1.** List of bacterial strains.

| <b>Species and strain</b>                    | <b>Source</b> | <b>Accession No.</b> |
|----------------------------------------------|---------------|----------------------|
| <i>Escherichia coli</i> MFDpir               | 1             | /                    |
| <i>Escherichia coli</i> DH5 $\alpha$         | Vazyme        | /                    |
| <i>Snodgrassella alvi</i> M0351              | 2             | JACFSG000000000      |
| <i>Bifidobacterium choladohabitans</i> W8113 | 2             | JACFQZ000000000      |
| <i>Bombilactobacillus mellis</i> W8089       | 2             | JACFRJ000000000      |
| <i>Lactobacillus apis</i> W8172              | 2             | JACFPG000000000      |
| <i>Gilliamella apicola</i> B14384H2          | 2             | JACFQC000000000      |

**Supplementary Table 2. Plasmid list.**

| <b>Name</b>  | <b>Use</b>                                                  | <b>Source</b> |
|--------------|-------------------------------------------------------------|---------------|
| pBTK501      | Constitutive GFP                                            | 1             |
| pYTK002      | Type 2 YTK/BTK connector sequence part plasmid              | 1             |
| pYTK072      | Type 5 YTK/BTK connector sequence part plasmid              | 1             |
| pBTK301      | Type 6-7 BTK bridge connector sequence part plasmid         | 1             |
| pBTK401      | Type 8 origin of replication and origin of transfer plasmid | 1             |
| pBTK150      | Type 2 BTK part: terminator, CP25 promoter, no RBS          | 3             |
| pBTK151      | Type 4 BTK part: reverse CP25 promoter, terminator, no RBS  | 3             |
| pYTK001_T1T2 | Insulated part vector with flanking terminators             | 3             |
| pDS-GFP      | Control dsRNA GFP                                           | 3             |
| pDS-γGCS     | dsRNA target γGCS                                           | This Study    |
| pDS-GS       | dsRNA target GS                                             | This Study    |
| pDS-GPx-1    | dsRNA target GPx-1                                          | This Study    |
| pDS-GPx-2    | dsRNA target GPx-2                                          | This Study    |
| pDS-TrxR     | dsRNA target TrxR                                           | This Study    |
| pDS-TPx      | dsRNA target TPx                                            | This Study    |



### Supplementary Table 3. Primer list.

| Purpose               | Gene                                                                        | Gene Symbol in NCBI | Forward                                 | Reverse                                  | Source     |
|-----------------------|-----------------------------------------------------------------------------|---------------------|-----------------------------------------|------------------------------------------|------------|
| qPCR                  | $\beta$ -tubulin ( <i>N. ceranae</i> )                                      | AAJ76_300077627     | AGAACCAGGAACGATGGAGA                    | TCCTTGCAAACAATCTGCAC                     | 4          |
| qPCR                  | Duox ( <i>A. mellifera</i> , Amel_HAv3.1)                                   | LOC551970           | CCCTAATAGCCCTCGTGAAC                    | GAGCATTCTCATAACGTGTG                     | 5          |
| qPCR                  | Nox ( <i>A. mellifera</i> , Amel_HAv3.1)                                    | LOC408451           | ACCTGCTCTGTTTGGTCTCG                    | ACATCCACCACGTCGAACAA                     | This study |
| qPCR                  | $\gamma$ -glutamyl-cysteine synthetase<br>( <i>N. ceranae</i> , ASM18298v1) | AAJ76_1100057370    | AACAGGCGAGGGAAGAAACC                    | CAACCCATACCTTGGCCCAT                     | This study |
| qPCR                  | Glutathione synthetase ( <i>N. ceranae</i> )                                | AAJ76_600034116     | TGGGAGTTTAATCGTTCTTGATGG                | TCTAAACCGCCATTGCCAGA                     | This study |
| qPCR                  | Glutathione peroxidase ( <i>N. ceranae</i> )                                | AAJ76_3500027152    | GGCAAATCCACATGTAGAAGC                   | TCTGCTATAGACTACAAAGACAAGA                | This study |
| qPCR                  | Glutathione peroxidase ( <i>N. ceranae</i> )                                | AAJ76_3500027978    | TGCAGTTGATTCAAAACAGTCAC                 | AGGCCCTTTGTCATAAAATTCGTCT                | This study |
| qPCR                  | Thioredoxin reductase ( <i>N. ceranae</i> )                                 | AAJ76_5800012528    | GTGGTCTGCAGCCTATTCT                     | TACTTCCTACCATCCCGCCT                     | This study |
| qPCR                  | Thioredoxin peroxidase ( <i>N. ceranae</i> )                                | AAJ76_280004776     | TGATTTTACTTTTGTGTGCCAAT                 | CACCGTCTGTCTTGGGAG                       | This study |
| qPCR                  | SSU rRNA ( <i>N. ceranae</i> )                                              | AAJ76_1700061205    | GTCGCTATGATCGCTTGCC                     | TATTGTAGAGAGGTGGGAGATT                   | 6          |
| RNAI_Type3            | $\gamma$ -glutamyl-cysteine synthetase ( <i>N. ceranae</i> )                | AAJ76_1100057370    | CGGTCTCATATGCCAAAAGCAGGTGTTCTCCA        | TGGTCTCAGGATGGGAGTTGCTTGCAATTCAT         | This study |
| RNAI_Type3            | Glutathione synthetase ( <i>N. ceranae</i> )                                | AAJ76_600034116     | CGGTCTCATATGGCTAGAGCGGTGGGTTTAGT        | TGGTCTCAGGATACCAAATGATACAAAACACTGTGAA    | This study |
| RNAI_Type3            | Glutathione peroxidase ( <i>N. ceranae</i> )                                | AAJ76_3500027152    | CGGTCTCATATGGCGCACTTCTAGACGATCTCC       | TGGTCTCAGGATACATGTGGATTTGCCAAGAGT        | This study |
| RNAI_Type3            | Glutathione peroxidase ( <i>N. ceranae</i> )                                | AAJ76_3500027978    | CGGTCTCATATGTTCTTGTTCGCAATTTTAAACCA     | TGGTCTCAGGATATAACCTCTGTTGGTCCATATCGC     | This study |
| RNAI_Type3            | Thioredoxin reductase ( <i>N. ceranae</i> )                                 | AAJ76_5800012528    | CGGTCTCATATGAGGAGGAGACTCTGCTATGGA       | TGGTCTCAGGATCGCAGTCGTACAATCCTCGT         | This study |
| RNAI_Type3            | Thioredoxin peroxidase ( <i>N. ceranae</i> )                                | AAJ76_280004776     | CGGTCTCATATGACGTTGTCAGTGATAGGAAGGA      | TGGTCTCAGGATACACATGATCCATTGCGTCCA        | This study |
| ds_RNAi               | $\gamma$ -glutamyl-cysteine synthetase ( <i>N. ceranae</i> )                | AAJ76_1100057370    | TAATACGACTCACTATAGGGTTGGATTCTGGGCAACGGT | TAATACGACTCACTATAGGGCGAACCTCGTCAGCAAAGG  | This study |
| ds_RNAi               | Thioredoxin reductase ( <i>N. ceranae</i> )                                 | AAJ76_5800012528    | TAATACGACTCACTATAGGGAGGAGACTCTGCTATGGA  | TAATACGACTCACTATAGGGCGCAGTCGTACAATCCTCGT | This study |
| <i>Nosema apis</i>    | SSU rRNA ( <i>N. apis</i> )                                                 | U97150              | CCATTGCCGATAAGAGAGT                     | TATATTTATTGTATTGCGCGTGCT                 | 7          |
| <i>Nosema ceranae</i> | SSU rRNA ( <i>N. ceranae</i> )                                              | DQ486027            | AGAAACTACAACAGCATCACTGGGA               | AGTGAATATTCCAATCCCAACGACTT               | 7          |

**Supplementary Table 4. Target sequences of dsRNA.**

| ID                                                                                                                                                                                                                                                                                                                                                                                       | Use             | Length (bp) | GC % | Sequence Source |
|------------------------------------------------------------------------------------------------------------------------------------------------------------------------------------------------------------------------------------------------------------------------------------------------------------------------------------------------------------------------------------------|-----------------|-------------|------|-----------------|
| <b>pDS-γGCS</b>                                                                                                                                                                                                                                                                                                                                                                          | γGCS knockdown  | 339         | 35   | This Study      |
| <p>CCAAAAAGCAGGTGTTCTCCATTTGATTTATTTATTTCTAATGACGCTAGAAATTTAGACAAGTACAACGATACAAATCCACCG<br/> ATCCACGTGCCGATTTTTAATAAAATTAATAAAGAAAGGTGTTGATGAAAAATTGTCGCGACATGTAGCATCTTTATTTATTCGC<br/> GATCCTATAGTCTCATATGACGAAACAGATGAAAGCACATTTGACGATTTTGAAAACATACAAAGTTCAAATTTGGAGATCTGTA<br/> AGGTTTAAAGTACCAACAGAAAGTTCTGATAAAGATTTAAGAGGATGGAAAGTTGAAGTTCGTCCTATGGAAATGCAAGCAAC<br/> TCCC</p>     |                 |             |      |                 |
| <b>pDS-GS</b>                                                                                                                                                                                                                                                                                                                                                                            | GS knockdown    | 330         | 27   | This Study      |
| <p>GCTAGAGCGGTGGGTTTAGTAAATCCATCTACAGGAAACATACTAAATATAACTATAAGACCCTCTAAAATATCAAGATTACAT<br/> TTTTATCGATAAAAAATTTACAATTAATACTTAAATTTACTGTACTACAATCTAAGCAAAGACTTAGATTTCATACACTTTTGATGA<br/> ACCAATGTACAAATTTTGCACCTCGATTTACACTGAAAAAATGGTAAAAAAGACAATATAGTAGCACTTTATATTAGATCT<br/> GATTATTTATTAGACGGTGACCAATATAAACAAGTAGAAATTAATACTATTTACAGTGTTTTGTATCATTGGT</p>                           |                 |             |      |                 |
| <b>pDS-GPx-1</b>                                                                                                                                                                                                                                                                                                                                                                         | GPx-1 knockdown | 348         | 28   | This Study      |
| <p>ACATGTGGATTTGCCAAGAGTAATCTTTCTATACTAGCTGATATTATGACACTGTATAAAGAATATGGCCTTAAAAATATTGATC<br/> TTTCTTTGTCTGCAATATTCAAAGATGATACTGATTTACTTAAAAAGATGTATAACTTAATAACAGAATATTCTGATGATTTTA<br/> CAGTATTTAGTGATTAATTTGGTCGGTAAAAATATACATCCTGTTTATAAGCATATTGTAAGGTATAGAAAAGAGTTTGTAG<br/> GAGATTTATAAAATGGAATTTGCAAAAATTTATTGTTAATGAATACGGTGAATAGTAAAAATTTTGAACCAGGAGATCGTC<br/> TAGAAGTGCGC</p>   |                 |             |      |                 |
| <b>pDS-GPx-2</b>                                                                                                                                                                                                                                                                                                                                                                         | GPx-2 knockdown | 250         | 30   | This Study      |
| <p>TTCTTTGTTCCGAATTTTTAAACCAGGAATCTGGTGATATTGAACTATTCGCAATTATGCGCATTCTATTTCTGATAAATTTAT<br/> CGTATTTGACAAAGTTAATGTATTTGGATCTCAAAAAGATCCTGTTTTAAGTATTTAACAGACAACAGTTCAGAAAGTTTTTTT<br/> AAGTTTGAAAAATGGAACCTTACAAAATGGGTTGTTAAAGATGGAAAGATTTTAAAGCGATATGGACCAACAGAGTTAT</p>                                                                                                               |                 |             |      |                 |
| <b>pDS-TrxR</b>                                                                                                                                                                                                                                                                                                                                                                          | TrxR knockdown  | 349         | 28   | This Study      |
| <p>AGGAGGAGACTCTGCTATGGAAGAAGTCTTATTTTTATCTAAAATATGTTCTAAAGTTTATTTAATTCATCGAAGAAATGAATTT<br/> AGAAGCAGGAAGGATAAATTAGAAGAAGTAAAGAAGACAAAAATATAGTTATAGTTACACCATATAATCTAAAATCTGCCCAT<br/> GGAATTGATAAATTAGAATATATTATCCTTGAAAATGGGGCAGAACTAAAAAATTAGAAGTAGATGGATTGTTCTTTGGTATC<br/> GGTCATACACCTAATACCAATTTTTAGAAGAAAATTTTTACATGTTTTAGACAAAGATAAGTTTTATTAAGTAAACGAGGATT<br/> GTACGACTGCG</p> |                 |             |      |                 |
| <b>pDS-TPx</b>                                                                                                                                                                                                                                                                                                                                                                           | TPx knockdown   | 330         | 37   | This Study      |
| <p>ACGTTGTCAGTGATAGGAAGGAAGAGTTTATTAACGCAATGTTGTTGTTTACAATTTCTAAAGATTCCGCATACAATCATC<br/> AAGCATGGGCTAAACTCCCAAGACAGGACGGTGGCGTAGAAGGAATACAATGGCCAATGTTGGCAGATAAGAATGCTCGTT<br/> TAAGTCGACAGTTTGGTTTGTATGATGATGAGGAAGATATCACAAAAGGGCTACTGTAATGATTGATGTTTCTGGAAATGTG<br/> TTAATATTTCTATCTATCATGAAAAATAGGAAGAAATGTTGATGAAATTTGAGGTTATTGGACGCAATGGATCATGTGT</p>                             |                 |             |      |                 |

## References

1. Leonard SP, *et al.* Genetic Engineering of Bee Gut Microbiome Bacteria with a Toolkit for Modular Assembly of Broad-Host-Range Plasmids. *ACS Synth Biol* **7**, 1279-1290 (2018).
2. Wu J, *et al.* Honey bee genetics shape the strain-level structure of gut microbiota in social transmission. *Microbiome* **9**, 225 (2021).
3. Leonard SP, *et al.* Engineered symbionts activate honey bee immunity and limit pathogens. *Science* **367**, 573-576 (2020).
4. He N, *et al.* RNA Interference-Mediated Knockdown of Genes Encoding Spore Wall Proteins Confers Protection against *Nosema ceranae* Infection in the European Honey Bee, *Apis mellifera*. *Microorganisms* **9**, (2021).
5. Azzouz-Olden F, Hunt A, DeGrandi-Hoffman G. Transcriptional response of honey bee (*Apis mellifera*) to differential nutritional status and *Nosema* infection. *BMC Genomics* **19**, 628 (2018).
6. Forsgren E, Fries I. Comparative virulence of *Nosema ceranae* and *Nosema apis* in individual European honey bees. *Vet Parasitol* **170**, 212-217 (2010).
7. Schwarz RS, Evans JD. Single and mixed-species trypanosome and microsporidia infections elicit distinct, ephemeral cellular and humoral immune responses in honey bees. *Dev Comp Immunol* **40**, 300-310 (2013).
